# Supplementary material
Source: PubMed Central journal article supplement (PMC10592158)
Supplement: NIHMS1925589-supplement-1.pdf [file NIHMS1925589-supplement-1.pdf]

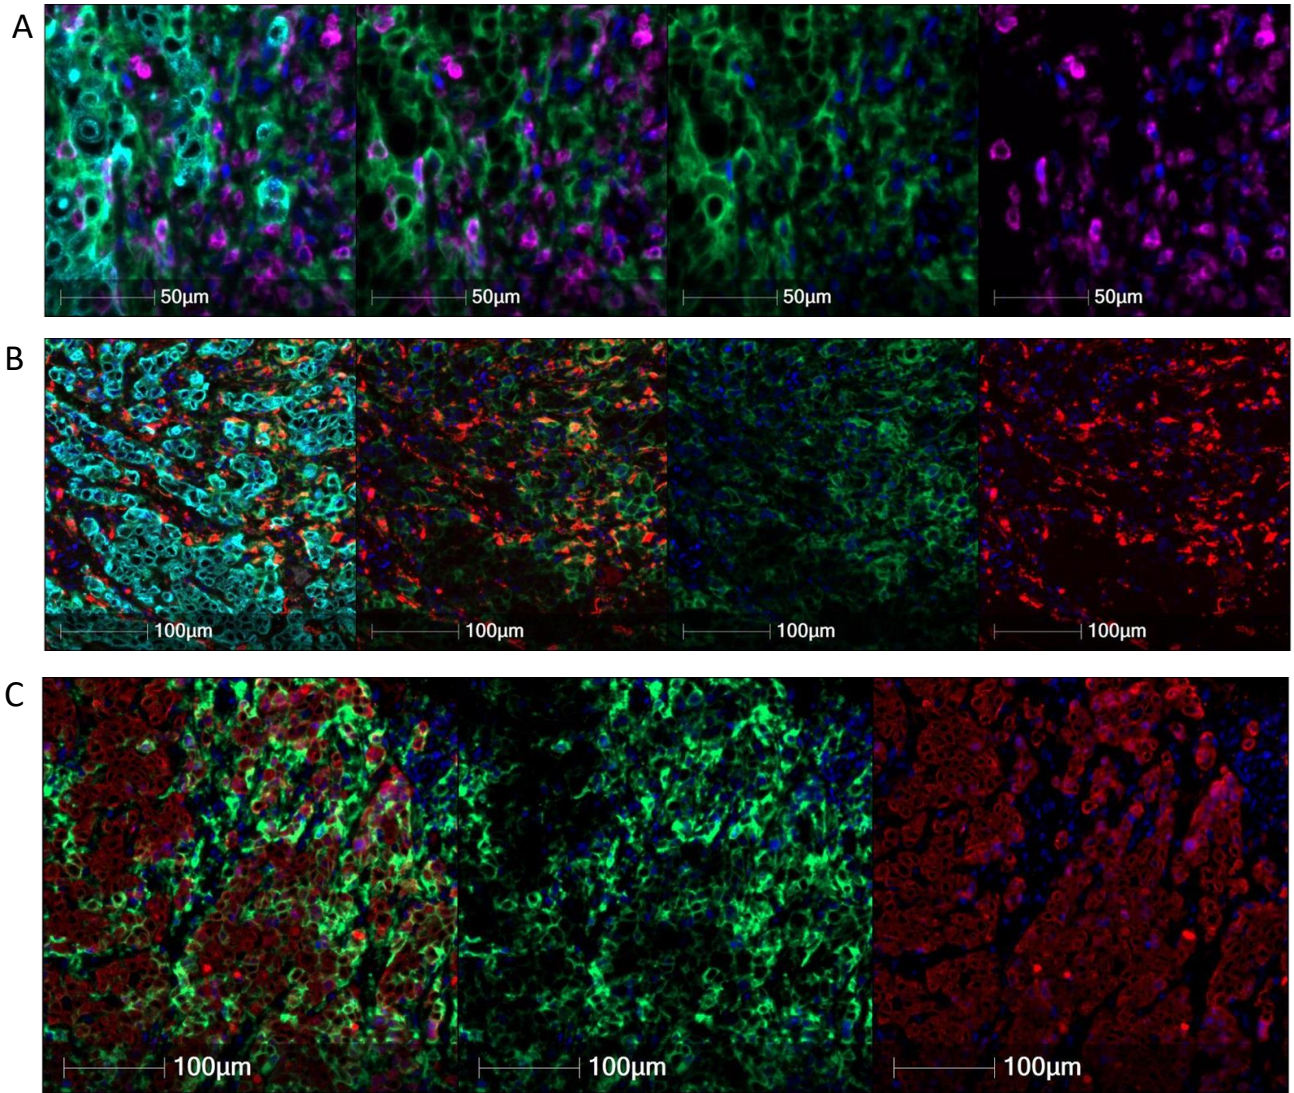

**Supplementary Figure S1.** PD-L1 (green) was expressed in (A) CD3+ T lymphocytes (magenta/pink), (B) CD68+ macrophages (red), panCK+ (cyan/light blue) tumor cells, and (C) tumor cells (red). PD-1 expression on CD8+ T lymphocytes was also observed.
