# Supplementary material
Source: PubMed Central journal article supplement (PMC10592158)
Supplement: NIHMS1925589-supplement-2.pdf [file NIHMS1925589-supplement-2.pdf]

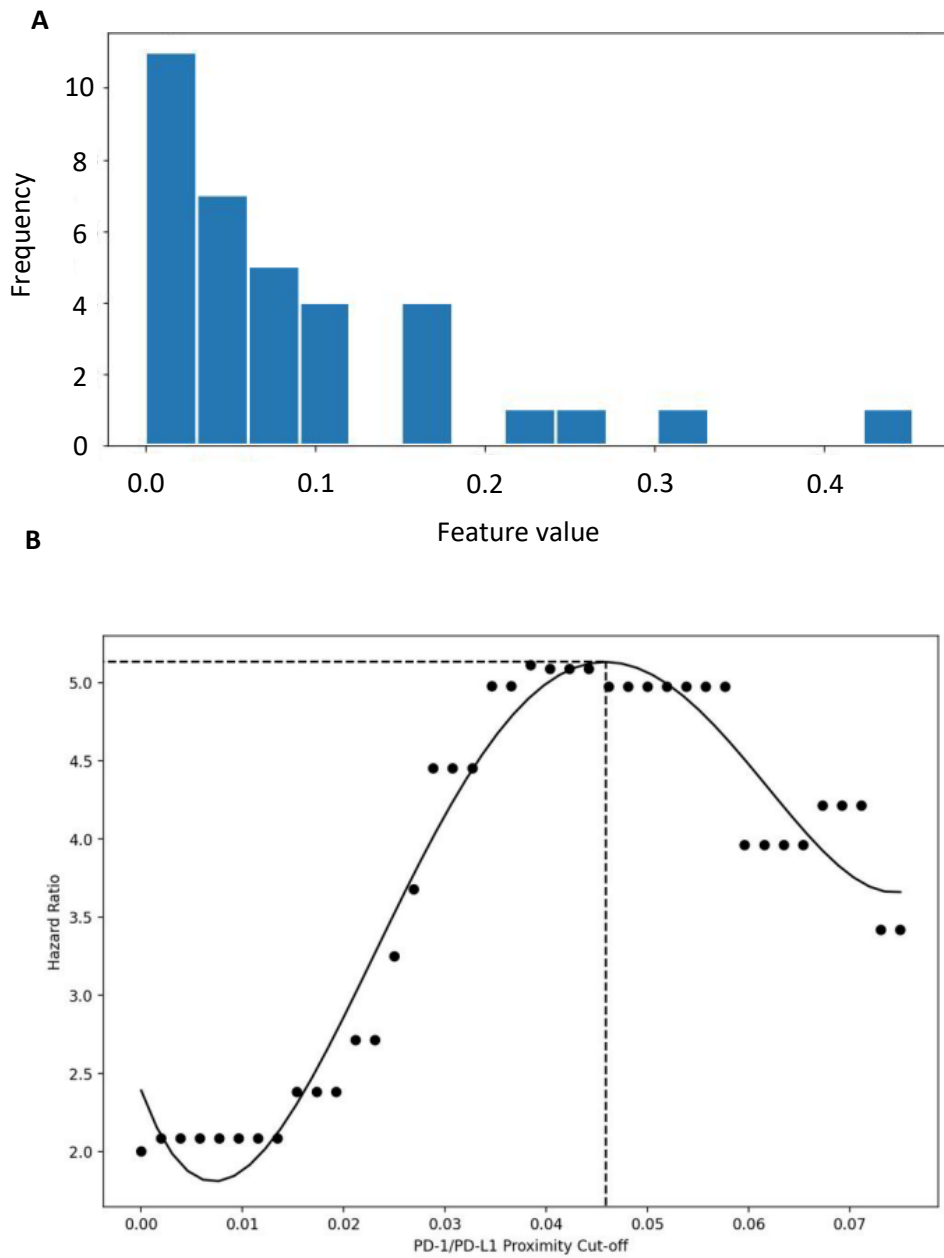

**Supplementary Figure S2.** (A) Distribution of mean number of PD-1<sup>+</sup> cells within 10 μm of a PD-L1<sup>+</sup> cell in the overall tumor; (B) range of possible cutoff values and corresponding hazard ratios.
