# Supplementary material
Source: PubMed Central journal article supplement (PMC10592158)
Supplement: NIHMS1925589-supplement-3.pdf [file NIHMS1925589-supplement-3.pdf]

**Supplementary Table S1.** Baseline characteristics of the study cohort.

| <b>Characteristic</b>               | <b>N = 33</b> |
|-------------------------------------|---------------|
| Age at first ICI (yrs) median (IQR) | 62 (49, 74)   |
| Sex, n (%)                          |               |
| Female                              | 16 (48%)      |
| Male                                | 17 (52%)      |
| Race, n (%)                         |               |
| White                               | 31 (97%)      |
| Other                               | 1 (3%)        |
| Smoking, n (%)                      |               |
| Active                              | 3 (9%)        |
| Former                              | 11 (34%)      |
| Never                               | 18 (57%)      |
| Tumor Grade, n (%)                  |               |
| G1                                  | 1 (3%)        |
| G2                                  | 16 (50%)      |
| G3                                  | 15 (47%)      |
| Primary Tumor Site, n (%)           |               |
| Left                                | 13 (39%)      |
| Right                               | 20 (61%)      |
| KRAS, n (%)                         |               |
| Mutated                             | 9 (31%)       |
| WT                                  | 20 (69%)      |
| BRAF <sup>V600E</sup> , n (%)       |               |
| Present                             | 8 (28%)       |
| Absent                              | 21 (72%)      |
| MLH1 protein Loss, n (%)            |               |
| No                                  | 10 (33%)      |
| Yes                                 | 21 (67%)      |
| MSH2 protein Loss, n (%)            |               |
| No                                  | 25 (81%)      |
| Yes                                 | 6 (19%)       |
| MSH6 protein Loss, n (%)            |               |
| No                                  | 20 (65%)      |
| Yes                                 | 11 (35%)      |
| PMS2 protein Loss, n (%)            |               |
| No                                  | 9 (29%)       |
| Yes                                 | 22 (71%)      |

| <b>Characteristic</b>             | <b>N = 33</b>  |
|-----------------------------------|----------------|
| Number of Metastatic Sites, n (%) |                |
| 1                                 | 4 (13%)        |
| 2                                 | 14 (45%)       |
| 3+                                | 13 (42%)       |
| Metastatic Site, n (%)            |                |
| Liver Involved                    | 19 (59%)       |
| Lung Involved                     | 7 (22%)        |
| Number of Prior Regimens, n (%)   |                |
| 0                                 | 10 (30%)       |
| 1                                 | 15 (46%)       |
| 2                                 | 5 (15%)        |
| <u>&gt;3</u>                      | 3 (9%)         |
| PFS Status, n (%)                 |                |
| Censored                          | 13 (39%)       |
| Event                             | 20 (61%)       |
| PFS (Months), median (95%CI)      | 28.4 (9.8, NR) |
| Tumor response*, n (%)            |                |
| Complete response                 | 11 (33%)       |
| Partial response                  | 3 (9%)         |
| Stable disease                    | 1 (3%)         |
| Disease Progression               | 18 (55%)       |
| Objective response rate           | 42%            |

NR, not reached; \*determined at date of last follow-up
