# Supplementary material
Source: PubMed Central journal article supplement (PMC10592158)
Supplement: NIHMS1925589-supplement-4.pdf [file NIHMS1925589-supplement-4.pdf]

**Supplementary Table S2.** Significant features in the univariable analysis for prediction of progression-free survival.

| Feature Description                                                                                                                                                    | HR (95% CI)             | P-value |
|------------------------------------------------------------------------------------------------------------------------------------------------------------------------|-------------------------|---------|
| From the Panel 1 sample, within the tumor stroma region: The median distance of a PanCK+ cell to the nearest CD8+ cell, within a 10 µm search radius                   | 0.34 (0.14, 0.79)       | 0.013   |
| From the Panel 1 sample, within the tumor stroma region: the standard deviation in distance of a PanCK cell to the nearest CD8+ cell, within a 30 µm search radius     | 1.30 (1.00, 1.60)       | 0.045   |
| From the Panel 2 sample, within the epithelial tumor region: The average number of PD1+ cells within 10 µm of a PDL1+ cell                                             | 3.1e-6 (1.4e-11, 0.70)  | 0.044   |
| From the Panel 2 sample, within the epithelial tumor region: The standard deviation in distance of a PD1+ cell to the nearest PDL1+ cell, within a 30 µm search radius | 0.70 (0.51, 0.96)       | 0.025   |
| From the Panel 2 sample, within the tumor region: The average number of CD8+/PD1+ cells within 10 µm of a CD8+/PDL1+ cell                                              | 4.3e-6 (2.6e-10, 0.07)  | 0.013   |
| From the Panel 2 sample, within the tumor region: The average number of CD8+/PD1+ cells within 30 µm of a CD8+/PDL1+ cell                                              | 0.29 (0.11, 0.81)       | 0.018   |
| From the Panel 2 sample, within the tumor region: The median distance of a CD8+/PDL1+ cell to the nearest CD8+/PD1+ cell, within a 30 µm search radius                 | 1.40 (1.10, 1.90)       | 0.009   |
| From the Panel 2 sample, within the tumor region: The average number of CD8+/PD1+ cells within 10 µm of a PDL1+ cell                                                   | 6.3e-10 (3.4e-17, 0.01) | 0.013   |
| From the Panel 2 sample, within the tumor region: The average number of CD8+/PD1+ cells within 30 µm of a PDL1+ cell                                                   | 0.19 (0.04, 0.83)       | 0.027   |
| From the Panel 2 sample, within the tumor region: The median distance of a PDL1+ cell to the nearest CD8+/PD1+ cell, within a 30 µm search radius                      | 1.40 (1.10, 1.80)       | 0.019   |
| From the Panel 2 sample, within the tumor region: The average number of CD8+/PD1+ cells within 10 µm of a PanCK+/PDL1+ cell                                            | 1.5e-9 (2.7e-16, 0.01)  | 0.01    |
| From the Panel 2 sample, within the tumor region: The average number of CD8+/PD1+ cells within 30 µm of a PanCK+/PDL1+ cell                                            | 0.09 (0.01, 0.55)       | 0.0009  |
| From the Panel 2 sample, within the tumor region: The median distance of a PanCK+/PDL1+ cell to the nearest CD8+/PD1+ cell, within a 30 µm search radius               | 1.3 (1.1, 1.6)          | 0.011   |
| From the Panel 2 sample, within the tumor region: The average number of PD1+ cells within 10 µm of a PDL1+ cell                                                        | 4e-8 (3.1e-13, 0.01)    | 0.004   |
| From the Panel 2 sample, within the tumor region: The average number of PD1+ cells within 30 µm of a PDL1+ cell                                                        | 0.26, (0.9, 0.73)       | 0.01    |
| From the Panel 2 sample, within the tumor region: The median distance of a PDL1+ cell to the nearest PD1+ cell, within a 30 µm search radius                           | 1.4 (1.1, 1.8)          | 0.009   |
| From the Panel 2 sample, within the tumor stroma region: The average number of CD8+/PD1+ cells within 10 µm of a PDL1+ cell                                            | 3.9e-10 (7.1e-18, 0.02) | 0.017   |

|                                                                                                                                                                 |                      |       |
|-----------------------------------------------------------------------------------------------------------------------------------------------------------------|----------------------|-------|
| From the Panel 2 sample, within the tumor stroma region: The average number of CD8+/PD1+ cells within 30 µm of a PanCK+/PDL1+                                   | 0.18 (0.04, 0.77)    | 0.021 |
| From the Panel 2 sample, within the tumor stroma region: The median distance of a CD8+/PD1+ cell from the nearest CD8+/PDL1+ cell, within a 10 µm search radius | 0.13 (0.02, 0.69)    | 0.016 |
| From the Panel 2 sample, within the tumor stroma region: The average number of PD1+ cells within 10 µm of a PDL1+ cell                                          | 1.6e-6 (9e-11, 0.03) | 0.007 |
| From the Panel 2 sample, within the tumor stroma region: The average number of PD1+ cells within 30 µm of a PDL1+ cell                                          | 0.35 (0.15, 0.82)    | 0.016 |
| From the Panel 2 sample, within the tumor stroma region: The median distance of a PDL1+ cell to the nearest PD1+ cell, within a 30 µm search radius             | 1.40 (1.10, 1.70)    | 0.015 |
