# Supplementary material
Source: PubMed Central journal article supplement (PMC10592158)
Supplement: NIHMS1925589-supplement-5.pdf [file NIHMS1925589-supplement-5.pdf]

**Supplementary Table S3.** Significant features in the univariable analysis for prediction of tumor response.

| Feature Description                                                                                                                                        | LLR   | P-value |
|------------------------------------------------------------------------------------------------------------------------------------------------------------|-------|---------|
| From the Panel 1 sample, within the epithelial tumor region: The median distance of a CD8+ cell from the nearest PanCK+ cell, within a 30 µm search radius | 15.06 | <0.001  |
| From the Panel 2 sample, within the tumor region: The average number of PD1+ cells within 30 µm of a PDL1+ cell                                            | 12.54 | <0.001  |
| From the Panel 1 sample, within the tumor region: The average number of CD8+ cells within 10 µm of a PanCK+ cell                                           | 12.07 | <0.001  |
| From the Panel 1 sample, within the tumor region: The median distance of a CD8+ cell to the nearest PanCK+ cell, within a 30 µm search radius              | 12.07 | <0.001  |
| From the Panel 1 sample, within the tumor stroma region: The number of CD3+ cells divided by the total number of cells                                     | 11.91 | <0.001  |
| From the Panel 1 sample, within the epithelial tumor region: The average number of CD8+ cells within 30 µm of a PanCK+ cell                                | 11.80 | <0.001  |
| From the Panel 2 sample, within the epithelial tumor region: The number of CD8+ /PanCK+ cells divided by the total number of cells                         | 11.75 | <0.001  |
| From the Panel 2 sample, within the tumor region: The average number of PD1+ cells within 10 µm of a PDL1+ cell                                            | 11.68 | <0.001  |
| From the Panel 1 sample, within the tumor region: The average number of CD8+ cells within 30 µm of a PanCK+ cell                                           | 11.61 | <0.001  |
| From the Panel 1 sample, within the tumor region: The average number of CD8+ cells within 10 µm of a PanCK+ cell                                           | 11.22 | <0.001  |
| From the Panel 2 sample, within the tumor region: The number of CD8+/PanCK+ cells divided by the total number of cells                                     | 11.05 | <0.001  |
| From the Panel 2 sample, within the epithelial tumor region: The average number of PDL1+ cells within 10 µm of a PD1+ cell                                 | 10.94 | <0.001  |
| From the Panel 2 sample, within the epithelial tumor region: The average number of PDL1+ cells within 30 µm of a PD1+ cell                                 | 10.8  | 0.001   |
| From the Panel 1 sample, within the tumor region: The number of CD3+ cells divided by the total number of cells                                            | 10.23 | 0.001   |
| From the Panel 1 sample, within the tumor stroma region: The number of CD3+/CD8+/PDL1- cells divided by the total number of cells                          | 9.66  | 0.002   |
| From the Panel 1 sample, within the tumor stroma region: The number of CD8+ cells divided by the total number of cells                                     | 9.38  | 0.002   |
| From the Panel 2 sample, within the tumor region: The number of PanCK+/PD1+ cells divided by the total number of cells                                     | 9.02  | 0.003   |

|                                                                                                                                                                     |      |       |
|---------------------------------------------------------------------------------------------------------------------------------------------------------------------|------|-------|
| From the Panel 2 sample, within the epithelial tumor region: The number of CD8+/PanCK-cells divided by the total number of cells                                    | 9.00 | 0.003 |
| From the Panel 1 sample, within the epithelial tumor region: The number of CD3+ cells divided by the total number of cells                                          | 8.64 | 0.003 |
| From the Panel 2 sample, within the tumor region: The average number of PDL1+ cells within 10 µm of a PD1+ cell                                                     | 7.88 | 0.005 |
| From the Panel 2 sample, within the tumor region: The number of PanCK+/PDL1+ cells divided by the total number of cells                                             | 7.77 | 0.005 |
| From the Panel 2 sample, within the tumor stroma region: The average number of PDL1+ cells within 30 µm of a PD1+ cell                                              | 7.60 | 0.006 |
| From the Panel 1 sample, within the tumor region: The number of CD8+ cells divided by the total number of cells                                                     | 7.38 | 0.007 |
| From the Panel 2 sample, within the epithelial tumor region: The average number of PD1+ cells within 10 µm of a PDL1+ cell                                          | 7.35 | 0.007 |
| From the Panel 2 sample, within the tumor region: The number of PanCK-/LAG3+ cells divided by the total number of cells                                             | 7.33 | 0.007 |
| From the Panel 1 sample, within the tumor region: The average number of CD8+ cells within 10 µm of a PanCK+/PDL1+ cell                                              | 7.25 | 0.007 |
| From the Panel 2 sample, within the tumor region: The average number of PD1+ cells within 30 µm of a PDL1+ cell                                                     | 7.22 | 0.007 |
| From the Panel 2 sample, within the epithelial tumor region: The average number of PD1+ cells within 30 µm of a PDL1+ cell                                          | 6.98 | 0.008 |
| From the Panel 2 sample, within the epithelial tumor region: The median distance of a CD8+/PDL1+ cell from the nearest CD8+/PD1+ cell, within a 30 µm search radius | 6.97 | 0.008 |
| From the Panel 2 sample, within the tumor stroma region: The number of PanCK-/LAG3+ cells divided by the total number of cells                                      | 6.94 | 0.008 |
| From the Panel 1 sample, within the Tumor region: The number of CD3+/CD8+/PDL1- cells divided by the total number of cells                                          | 6.77 | 0.009 |
| From the Panel 2 sample, within the epithelial tumor region: The median distance of a CD8+ cell from the nearest PDL1+/PanCK+ cell, within a 30 µm search radius    | 6.55 | 0.01  |
| From the Panel 2 sample, within the tumor region: The number of PanCK-/CD8+ cells divided by the total number of cells                                              | 6.42 | 0.01  |
| From the Panel 2 sample, within the tumor stroma region: The number of PanCK-/CD8+ cells divided by the total number of cells                                       | 6.41 | 0.01  |
| From the Panel 2 sample, within the tumor stroma region: The average number of PDL1+ cells within 10 µm of a PD1+ cell                                              | 6.13 | 0.01  |
| From the Panel 1 sample, within the epithelial tumor region: The average number of CD8+ cells within 10 µm of a PDL1+/PanCK+ cell                                   | 6.06 | 0.01  |
| From the Panel 2 sample, within the tumor region: The median distance of a PDL1+ cell from the nearest PD1+ cell, within a 30 µm search radius                      | 5.74 | 0.02  |

|                                                                                                                                                          |      |      |
|----------------------------------------------------------------------------------------------------------------------------------------------------------|------|------|
| From the Panel 2 sample, within the tumor region: The median distance of a PD1 cell from the nearest PDL1+ cell, within a 30 $\mu\text{m}$ search radius | 5.21 | 0.02 |
|----------------------------------------------------------------------------------------------------------------------------------------------------------|------|------|
